# Supplementary figures and images for: Modified graphene foam as a high-performance catalyst for oxygen reduction reaction
Source: Royal Society of Chemistry journal article supplement (doi:10.1039/d3ra04203k), 2023-01-01

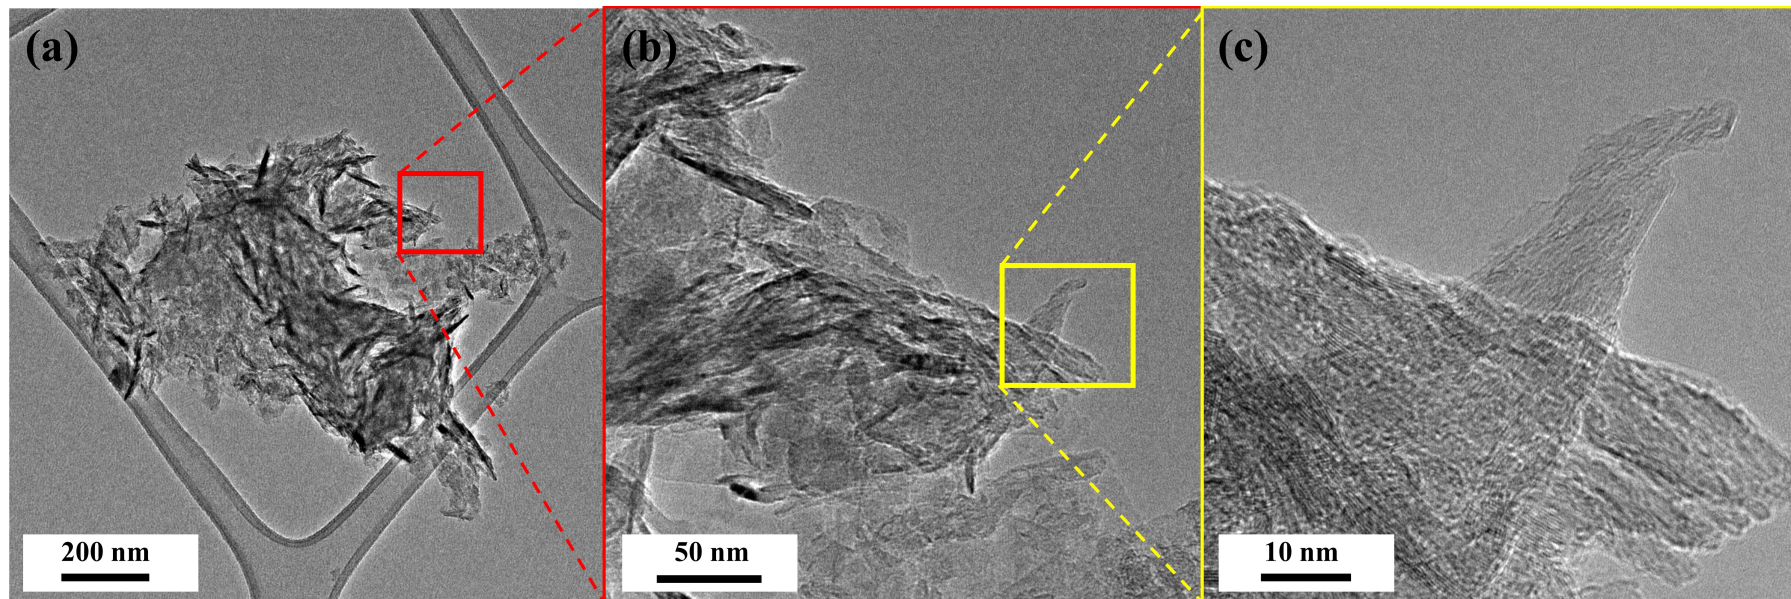

Supplement: d3ra04203k1.pdf [file d3ra04203k1.pdf]

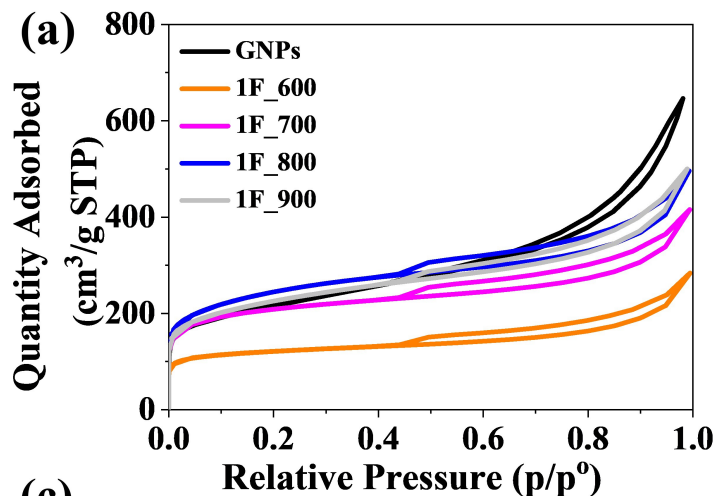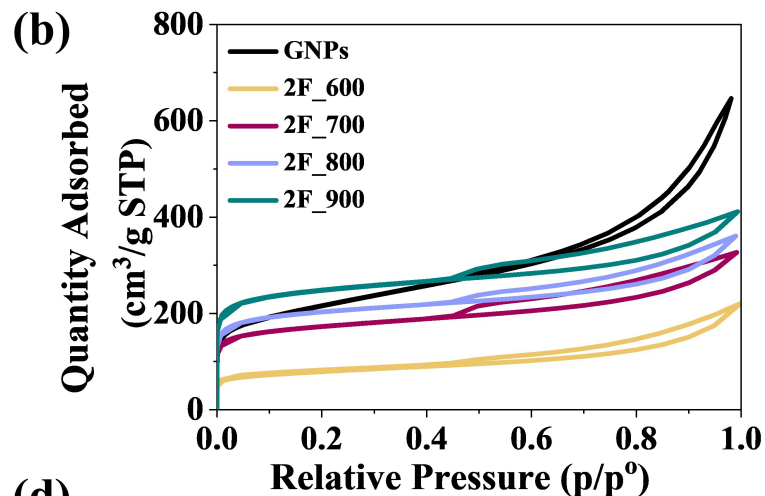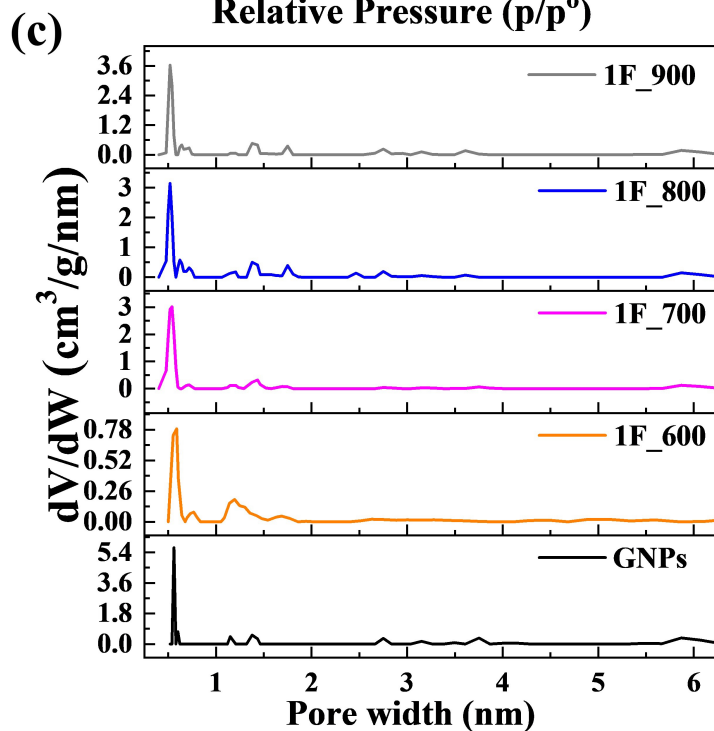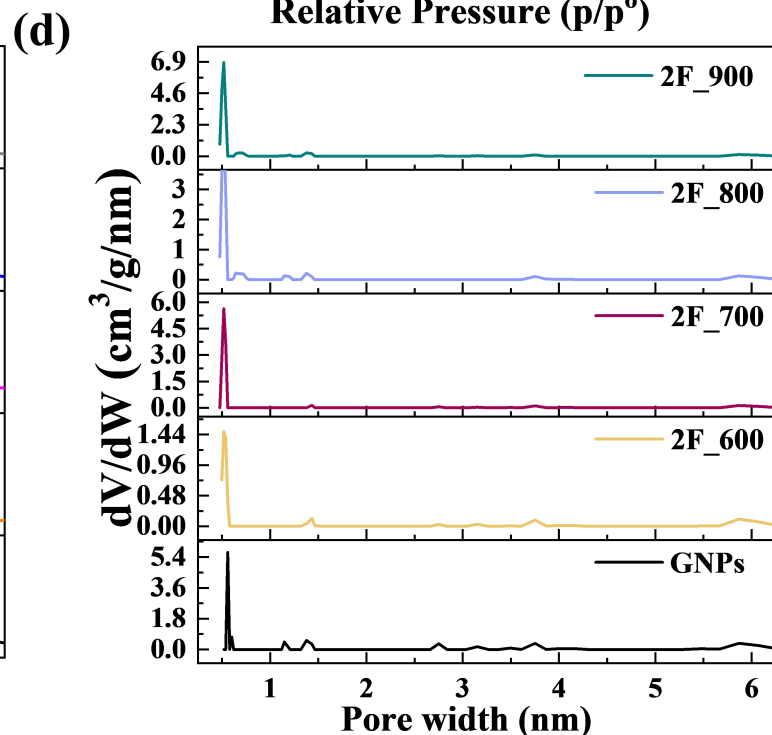

Supplement: d3ra04203k2.pdf [file d3ra04203k2.pdf]

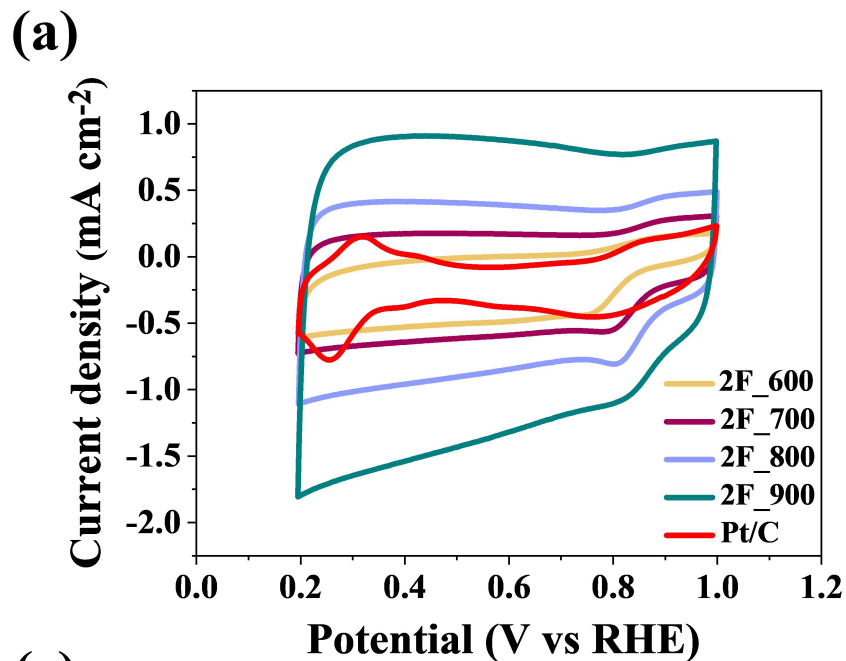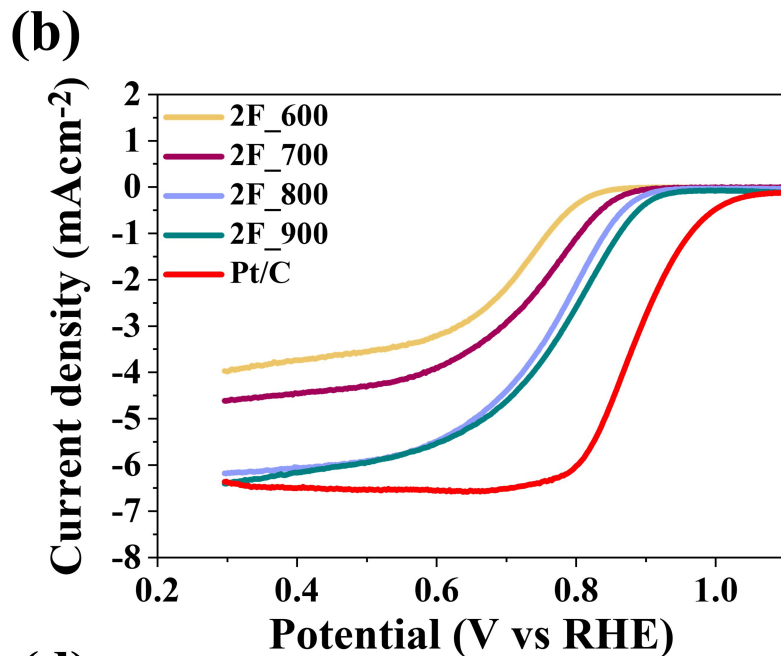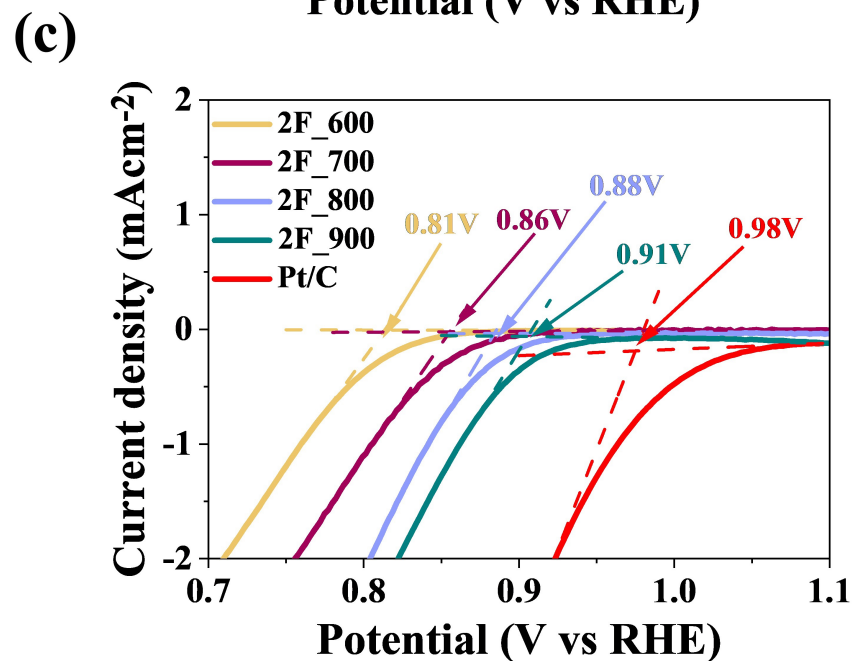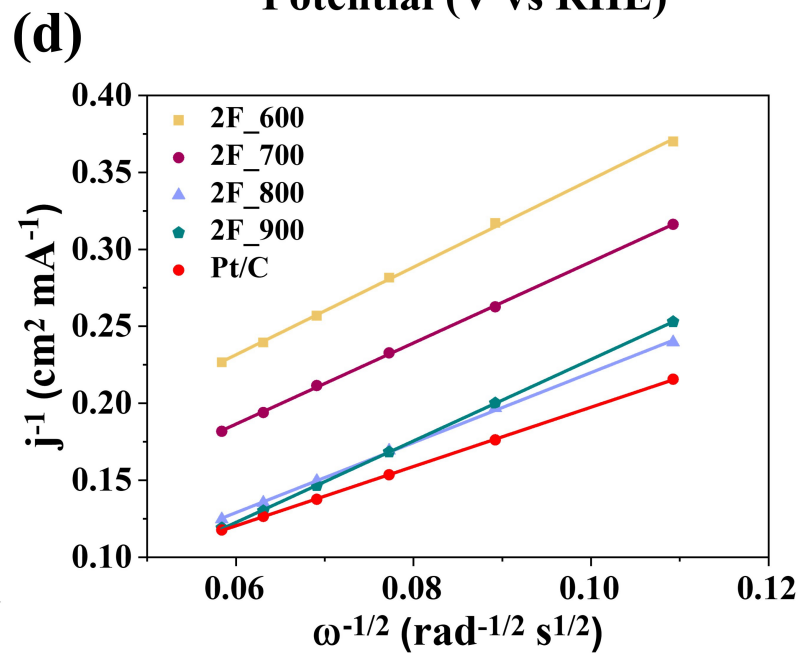

Supplement: d3ra04203k3.pdf [file d3ra04203k3.pdf]

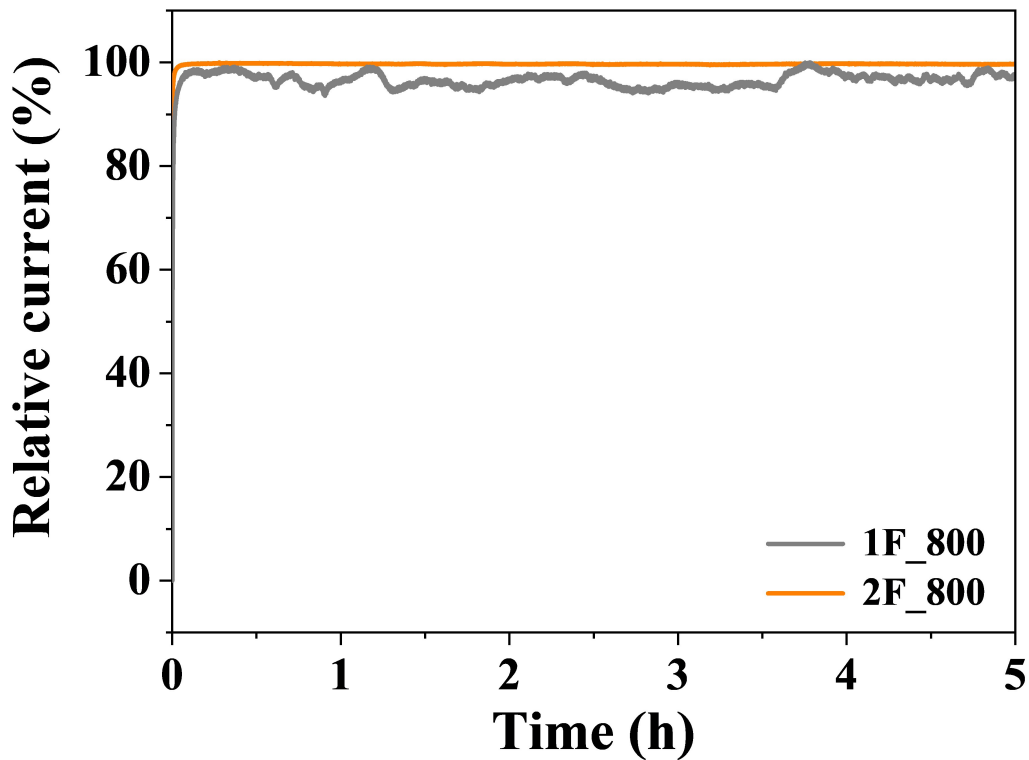

Supplement: d3ra04203k4.pdf [file d3ra04203k4.pdf]

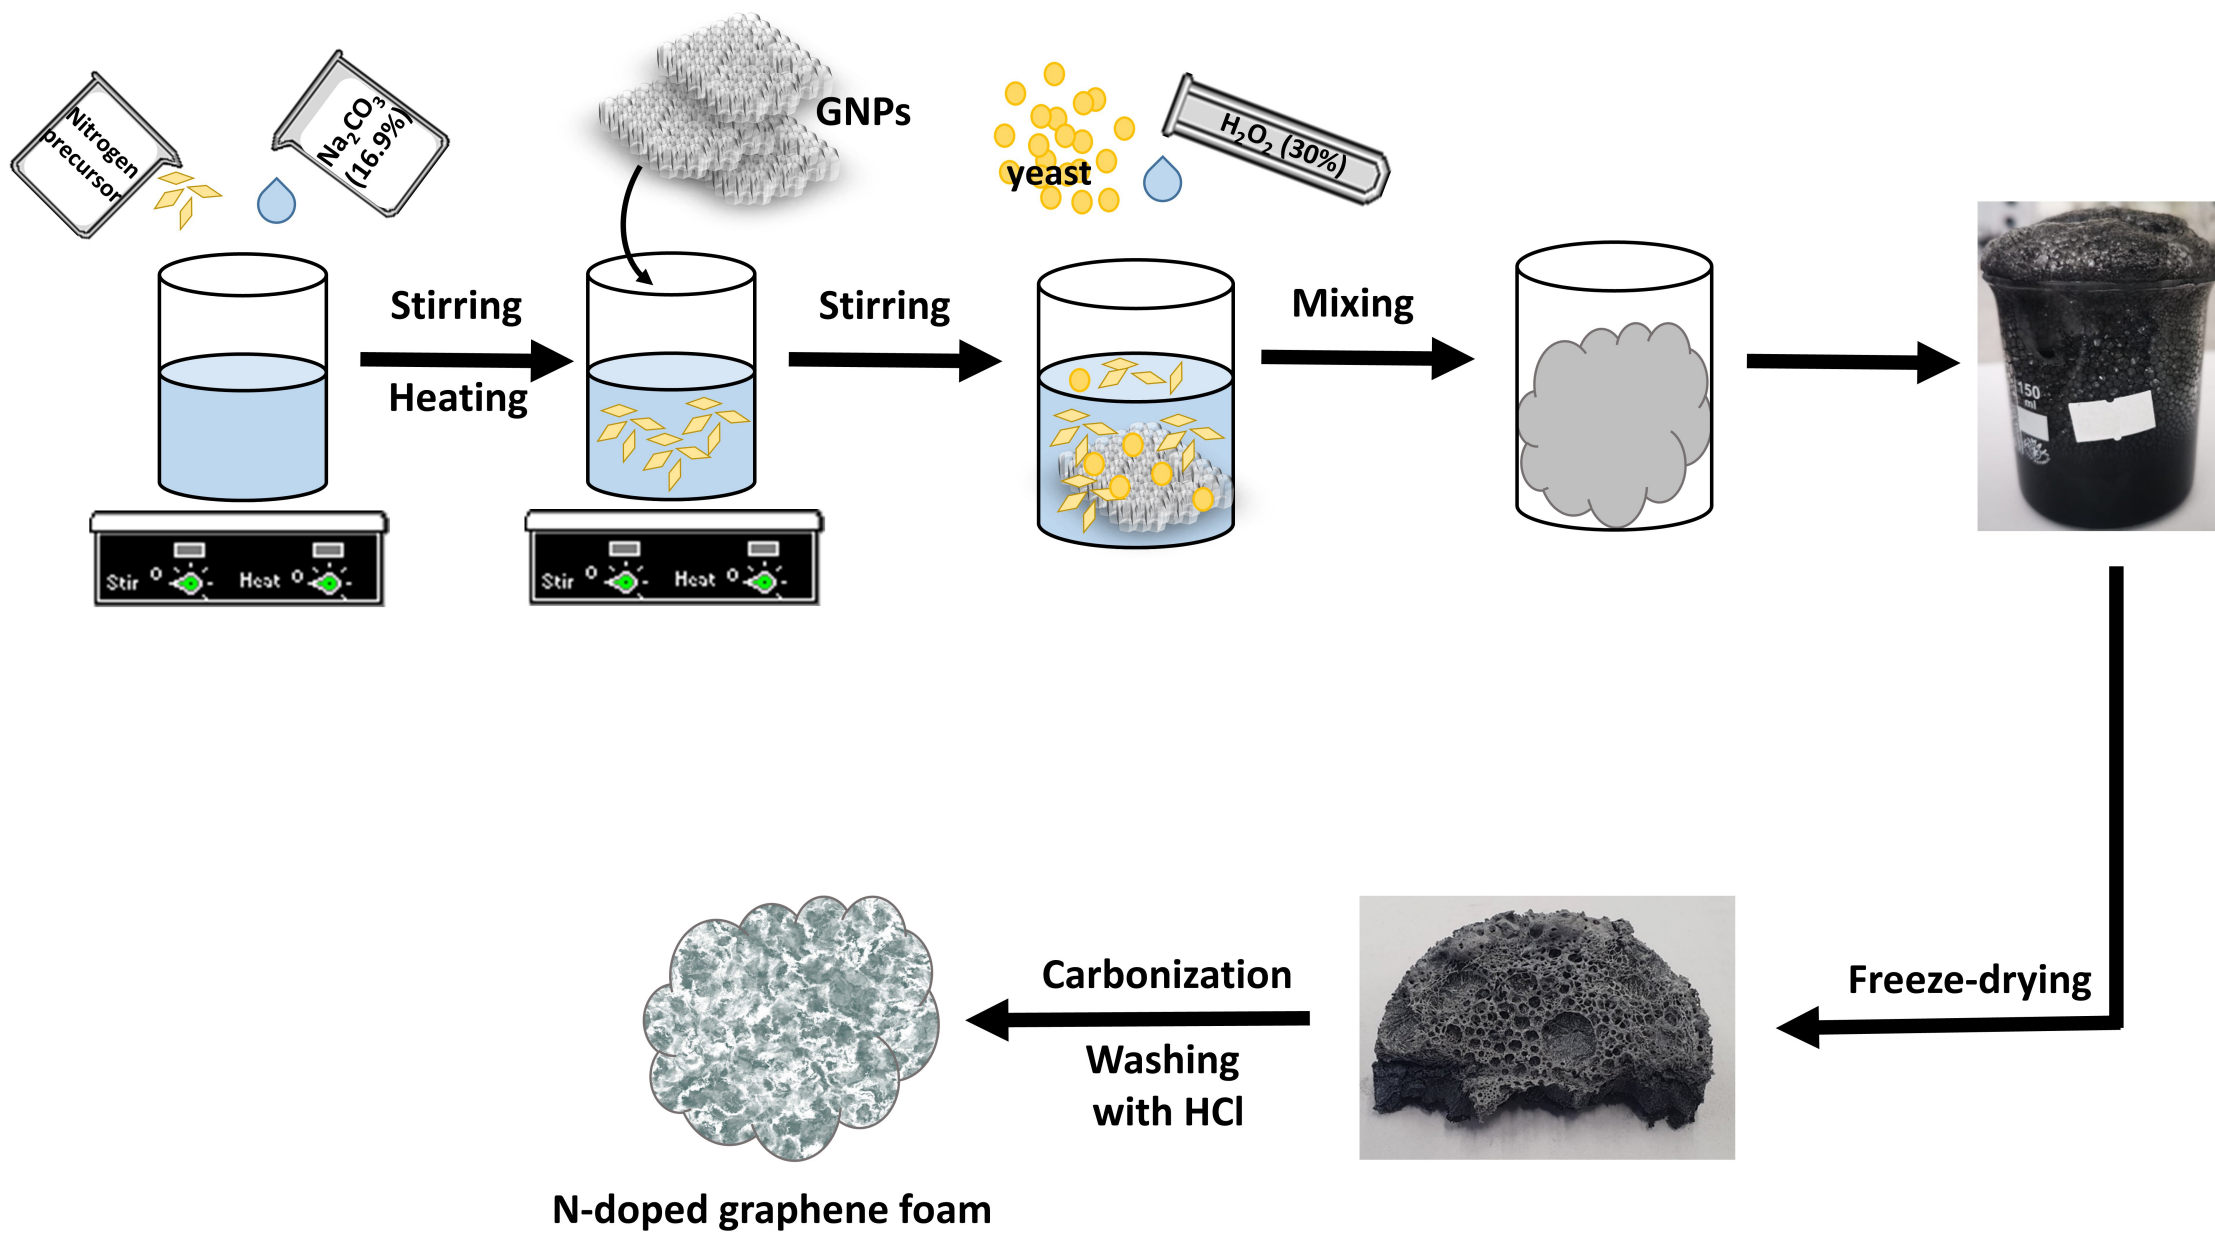

Supplement: d3ra04203k5.pdf [file d3ra04203k5.pdf]
